# Supplementary material for: An effective approach to reduce inflammation and stenosis in carotid artery: polypyrrole nanoparticle-based photothermal therapy
Source: Royal Society of Chemistry journal article supplement (doi:10.1039/c5nr00542f), 2015-01-01
Supplement: c5nr00542f1.pdf [file c5nr00542f1.pdf]

## Supporting Information:

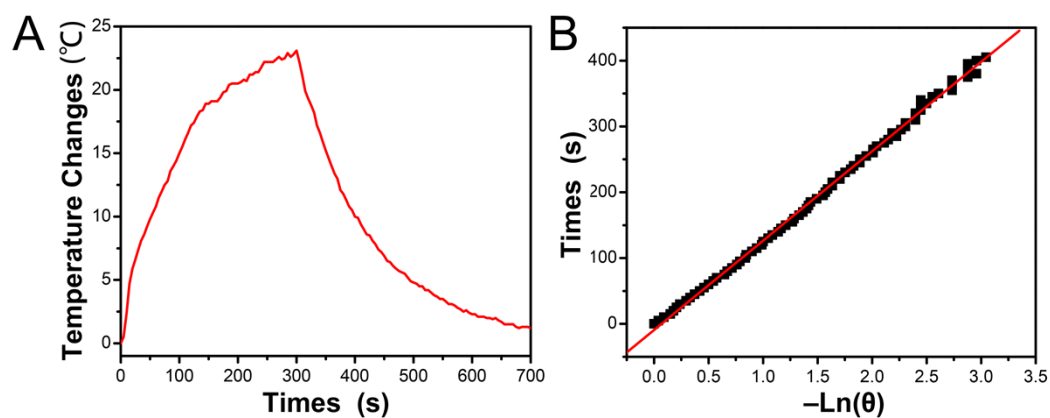

**Figure S1.** (A) Photothermal effect of the irradiation of the aqueous dispersion of PPy NPs with the NIR laser (915 nm, 0.69 W/cm<sup>2</sup>), in which the irradiation lasted for 5 min, and then the laser was shut off. (B) Time constant for heat transfer from the system is determined to be  $\tau_s = 135.7$  s by applying the linear time data from the cooling period (after 400 s) versus negative natural logarithm of driving force temperature, which is obtained from the cooling stage of Figure S1A.

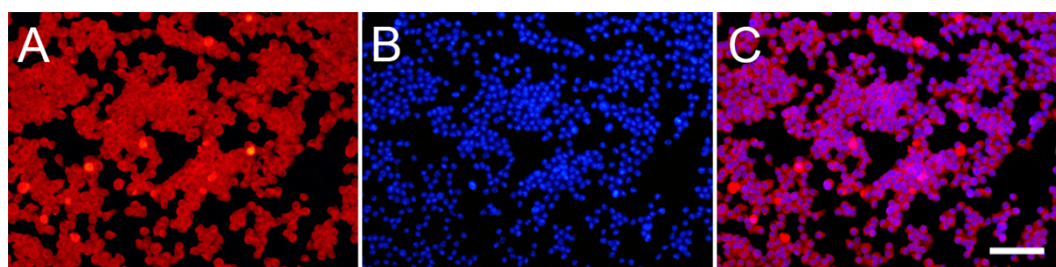

**Figure S2.** Identification of Ana-1 cells. (A) MAC 387, (B) DAPI, and (C) Merge. Scale bar = 100  $\mu$ m.

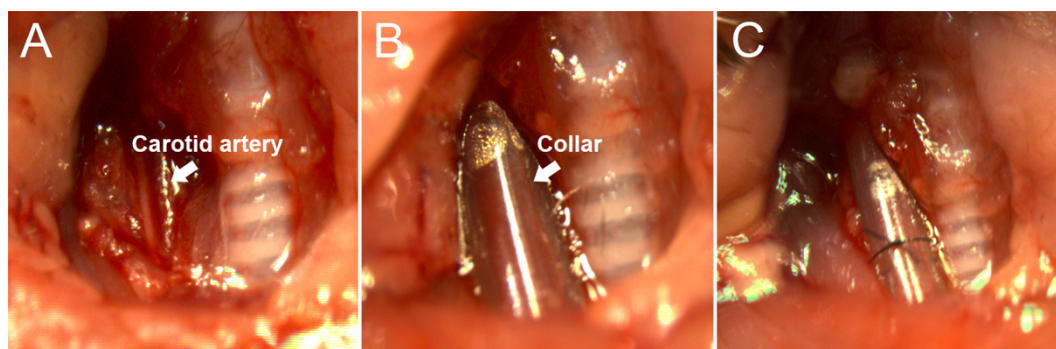

**Figure S3.** Carotid artery inflammation and stenosis ApoE<sup>-/-</sup> mice model. (A) Exposure of right carotid artery. (B) Place a silastic collar around the carotid artery. (C) Fix the collar to tissues around.

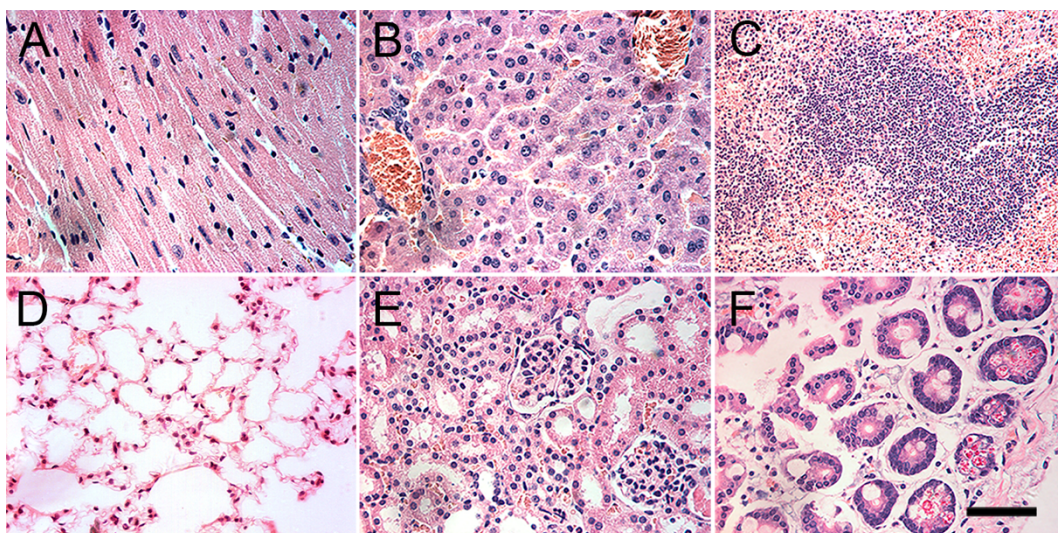

**Figure S4.** H&E staining of major organs in control group. (A) heart, (B) liver, (C) spleen, (D) lung, (E) kidney, and (F) intestine. Scale bar = 100  $\mu$ m.

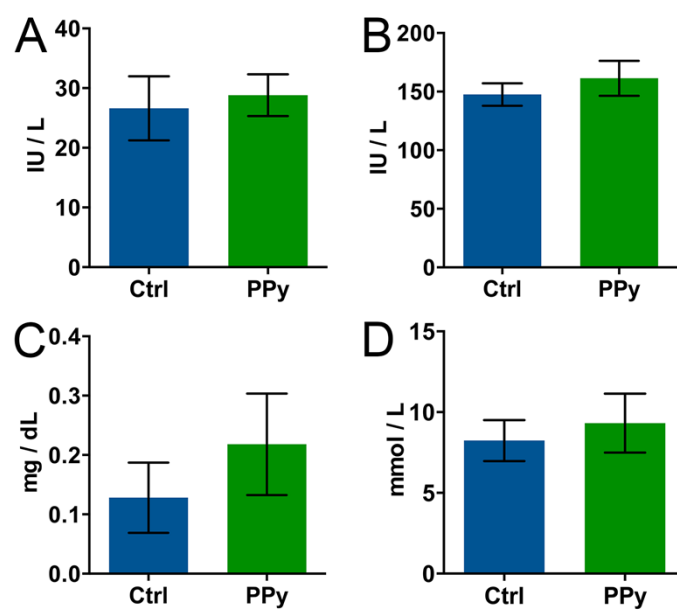

**Figure S5.** Hepatorenal function analysis. (A) ALT, (B) AST, (C) T-Bil and (D) BUN. No significant differences were detected between the PPy group and control group.
